# Supplementary material
Source: publisher figshare collection journal article supplement (https://gsapubs.figshare.com/ndownloader/files/22757615)
Supplement: Supplementary file 1 [file 22757615]

## DATA REPOSITORY

### THERMAL AND ZHe-DIFFUSION MODEL

#### *Thermal Diffusion Model*

Using a solution for diffusion in a sphere (Crank, 1975), we calculate the temperature from  $r_i/x = 0$  to  $r_i/x = 1$ , where  $x$  is the radius of the xenolith in meters,  $r_i$  is any point along that radius, and where  $i$  is any integer from 0 (the center of the sphere) to 1000 (the outer edge of the sphere):

$$T = T_x + (T_m - T_x) \left[ 1 + \left( \frac{2x}{\pi r_i} \right) \sum_{n=1}^{\infty} \frac{(-1)^n}{n} \sin \frac{n\pi r_i}{a} e^{-Dn^2\pi^2 t / x^2} \right]$$

For the singular case  $r_i/x \rightarrow 0$ , we use:

$$T = T_x + (T_m - T_x) \left[ 1 + 2 \sum_{n=1}^{\infty} (-1)^n e^{-Dn^2\pi^2 t / x^2} \right]$$

Each  $r_i$  corresponds to a spherical shell outer radius and the corresponding spherical shell volume between  $r_{(i-1)}$  and  $r_i$ . Within each shell volume, we assume a homogenous distribution of zircons and  $T$ - $t$  history. Assuming a thermal diffusivity for granite,  $\kappa = 1 \times 10^{-2} \text{ cm}^2/\text{s}$ , typical basalt temperatures of 1150, 1200, and 1250 °C, an estimated xenolith temperature of 100 °C, and a spherical xenolith with typical BPVF xenolith radii of 2.5, 5.0, 7.5, and 10 cm, we calculate the temperature at the outer radius of each of the 1000 spherical shells (zircon locations) for a range of times.

#### *He Loss Model*

Using the calculated time-temperature histories for each location in the xenolith, we then calculate the fractional He loss for a representative tetragonal zircon prism at each location, and for a range of magmatic residence durations. By assuming a typical zircon width,  $W$ , of 100  $\mu\text{m}$  and a length,  $L$  of  $3W$ , we calculate the radius of a sphere,  $a$ , with a corresponding surface-area to volume ratio ( $\beta$ ) (Meesters and Dunai, 2002a, b), using the relationship:  $a = R_{\text{sphere}} = 3 / \beta_{\text{zirc}}$ , where  $\beta_{\text{zirc}}$  is calculated based on a tetragonal prism with bipyramidal tips (Reiners, 2005). We model diffusive fractional He loss from this sphere for a range of times (Crank, 1975; McDougall and Harrison, 1999) using the following equation:

$$f = 1 - \left( 6 / \pi^2 \right) \sum_{n=1}^{\infty} \left( 1 / n^2 \right) \exp \left( - n^2 \pi^2 D t / a^2 \right)$$

where

$$D = D_0 \exp(-E_a / RT)$$

and  $D_0 = 0.46 \text{ cm}^2/\text{s}$  and  $E_a = 40.4 \text{ kcal/mol}$  (Reiners et al., 2004). The calculated xenolith temperature,  $T$ , is used to determine  $Dt/a^2$  for a given crystal, which we then use to calculate fractional He loss using the above equation. For this model, we require 99.99% degassing for a zircon to be considered fully degassed. In the case of a pre-

eruption ZHe age of 100 Ma, this represents only 10 kyr (0.01%) worth of remaining He left in the zircon, or 10% of a 100-ka eruption age. If the resulting fractional loss is less than the required 0.9999 to be considered fully degassed, then we consider the zircons within that shell to only be partially reset. Knowing the volume of each spherical shell, we then use the volume fraction of shells with partially reset zircons to give an estimate of the percent of xenolithic zircons with retained He for a given temperature, xenolith size and residence time in the melt (Fig 2).

If a 10-cm radius xenolith in a 1150 °C magma is allowed to heat for 1000 s, ~68% of zircon crystals will retain He ( $f < 0.9999$ ) (Fig 2). As a first order approximation of the potential effect of prolonged cooling in post-eruptive lava, we hold each grain at 600 °C after 1000 s for extended durations. If the same xenolith now remains entrained in a 600 °C lava at the surface for one year, ~34% of the xenolith zircon crystals still will retain He. Thus the He loss on the time-scale of cooling lava at low temperatures is minimal compared to the xenolith's residence at high (magmatic) temperatures.

## SAMPLE LOCATIONS AND PETROLOGY

The BPVF comprises several Pleistocene basaltic (and one rhyolitic) vents and flows in Owens Valley, CA, some of which have been previously dated using  $^{40}\text{Ar}/^{39}\text{Ar}$  and K/Ar techniques. The Oak Creek basalts are the southernmost flows of the volcanic field, originate in the Eastern Sierra, and outcrop on the west side of the valley. Due to the extent of erosion and alluviation, and their position beneath a Tahoe glacial moraine, at least some of the Oak Creek basalts are thought to be the oldest in the BPVF (Darrow, 1972). Previous  $^{40}\text{Ar}/^{39}\text{Ar}$  Oak Creek measurements of four whole-rock basalts and six feldspar xenolith separates gave a mean eruption age of  $1.18 \pm 0.05$  Ma ( $2\sigma$ ) (Gillespie et al., 1983). Four K/Ar ages from distinct outcrops in the eastern part of Oak Creek yielded ages of 0.10 Ma, 0.24 Ma, 0.33 Ma, and 0.42 Ma (Turrin and Gillespie, 1986; Connor and Conway, 2000). The sample used in this study (N  $36^{\circ}50.846'$ ; W  $118^{\circ}17.433'$ ) is near the  $^{40}\text{Ar}/^{39}\text{Ar}$  dated site A of Gillespie et al. (1983), to the east of  $^{40}\text{Ar}/^{39}\text{Ar}$  dated sites B and C of Gillespie et al. (1983), and to the west of the K/Ar dated Oak Creek outcrops (Turrin and Gillespie, 1986; Connor and Conway, 2000). The wide range of ages and the discontinuous outcrops suggest that the Oak Creek region has multiple vents. Obvious vent locations have been removed by erosion, making dating of the separate outcrops the most reliable method of determining whether they belong to one or many eruptions. The flow dated by ZHe is the youngest age found in the immediate vicinity, so it was not likely reset by later eruptions. Both ultramafic and granitoid xenoliths are present. In hand sample, many of the felsic xenoliths, such as the one used in this study, appear lithologically similar to the Eastern Sierran granodiorite exposed at the surface.

The Fish Springs cinder cone (N  $37^{\circ}04.601'$ ; W  $118^{\circ}15.670'$ ) of the BPVF is also located on the west side of Owens valley, north of Oak Creek. The previous  $^{40}\text{Ar}/^{39}\text{Ar}$  age determined for this cone using two K-feldspars crystals from one xenolith is  $0.314 \pm 0.036$  Ma ( $2\sigma$ ) (Martel et al., 1987; Connor and Conway, 2000). Abundant ultramafic and granitic xenoliths are present, and have much more pronounced alteration textures than any other xenolith suite in the BPVF. As a monogenetic vent, there are no overlying flows that might reset the He ages. The xenolith used in this study was granodioritic in composition.

Prindle volcano (N  $63^{\circ}43.2'$ ; W  $141^{\circ}37.2'$ ) is in eastern-most central Alaska, near the Yukon border, and represents the western-most extent of alkaline magmatism in the northern Cordilleran volcanic province (NCVP; Edwards and Russell, 2000). It is a basanitic scoria cone (Foster et al., 1966; Prescott, 1983) comprising a rim of agglutinated spatter and spindle bombs, breached on the southern end by a ~10 km long lava flow. The lava is olivine-phyric and contains a diverse population of feldspathic granulitic and peridotitic xenoliths (Foster et al., 1966; Prescott, 1983; Roughly et al., 2000; Ghent et al., 2004). The xenolith used for this study is a felsic granulite from the upper rim of the pyroclastic cone, and is not overlain by any flows that might reset the He age. Because the surficial rocks around Prindle are dominantly amphibolite-facies (Dusel-Bacon, 1994), it is likely that the granulite-facies xenoliths are derived from greater crustal depths. Ghent et al. (2004) reported equilibration temperatures and pressures of 770-1015 °C and 10-11 kb respectively for granulite xenoliths from Prindle. The Prindle granulite temperature estimates are considerably higher than those reported for surrounding amphibolites by Dusel-Bacon et al. (1995), which range from 570-700

°C. Assuming a median temperature of 635 °C for the amphibolites, a median temperature of 890 °C for the granulites, and a contemporaneous peak in metamorphic gradient for both rock types as part of a regional metamorphic sequence, we can calculate a minimum depth of incorporation. Using a conservatively cool geothermal gradient estimate of 25 °C/km the granulites would have formed approximately 10 km deeper in the crust than the amphibolites. Since the amphibolites are presently exposed at the surface, the granulites would have been incorporated into the Prindle basanite at a minimum depth of 10 km. The cone appears to be unmodified by glaciation or other erosional processes, and its age of formation has been estimated as Late Pleistocene (Foster et al., 1966). However, the only two attempts to date it gave inconsistent and anomalously old ages,  $6.26 \pm 0.15$  Ma ( $2\sigma$ ) and  $3.57 \pm 0.14$  Ma ( $2\sigma$ ) (Hunt and Roddick, 1992), which were attributed to either excess Ar or fractionation of the atmospheric argon component.

Little Bear Mountain volcano (N 56°49.2'; W 131°18.6') is immediately north of Hoodoo Mountain volcano (Edwards et al., 2002), near the southern end of the NCVP in western British Columbia. The alkaline basaltic volcano erupted mainly pyroclastic breccia, with minor amounts of massive lava, pillow lava, volcanic sandstone and hyaloclastite (Edwards et al., 1995; Edwards et al., 1999a). Its eruptions have been interpreted as subglacial, suggesting a pre-Holocene age (Edwards et al., 1995; Edwards, 1997). The massive basalt is olivine-, plagioclase-, and clinopyroxene-phyric and contains quartzose, gabbroic and syenitic xenoliths. The pyroxene syenite xenoliths used in this study show cross-cutting veinlets of obsidian indicating partial melting (Edwards, 1997). The analyzed xenolith was collected from near the top of the edifice, and nothing in the field relationships indicate that the sample would have ever been covered by younger lava flows.  $^{40}\text{Ar}/^{39}\text{Ar}$  dating of a massive basalt sample gave an age of  $0.253 \pm 0.047$  Ma ( $2\sigma$ ) (Villeneuve et al., 1998; Edwards et al., 1999b; Edwards et al., 2002), though there is some excess  $^{40}\text{Ar}$  and slight scatter in data. The basement geology surrounding the volcano is dominated by metasedimentary, metavolcanic, and meta-igneous rocks of the Mesozoic Stikine terrane (Edwards et al., 1999a). The xenolith is thought to have originated from mid-crustal depths, although no geobarometric constraints are available for the sample.

**Table DR 1.** (U-Th)/He AGES FOR INDIVIDUAL ZIRCONS OF THE FOUR VOLCANIC CENTERS.  
 $1\sigma$  REPRESENTS FORMAL ANALYTICAL ERROR OF INDIVIDUAL RUNS

| sample name                    | U<br>ppm | Th<br>ppm | Th/U<br>(atomic) | $^4\text{He}$<br>(nmol/g) | mass<br>(ug) | half-<br>width<br>(um) | HAC<br>(Ft) | corrected<br>age (ka) | $\pm 1\sigma$<br>analyt.<br>error |
|--------------------------------|----------|-----------|------------------|---------------------------|--------------|------------------------|-------------|-----------------------|-----------------------------------|
| <u>Oak Creek, BPVF</u>         |          |           |                  |                           |              |                        |             |                       |                                   |
| 01zA                           | 329      | 148       | 0.46             | 0.312                     | 15.6         | 60.8                   | 0.833       | 191                   | 3.9                               |
| 01zC                           | 238      | 105       | 0.45             | 0.201                     | 11.6         | 51.3                   | 0.810       | 176                   | 4.6                               |
| 01zE                           | 242      | 129       | 0.55             | 0.218                     | 12.5         | 48.5                   | 0.806       | 184                   | 5.0                               |
| 01zF                           | 291      | 132       | 0.47             | 0.282                     | 25.6         | 69.8                   | 0.857       | 189                   | 6.7                               |
| 01zG                           | 329      | 139       | 0.43             | 0.318                     | 12.5         | 59.5                   | 0.826       | 198                   | 9.0                               |
| 01zH                           | 448      | 173       | 0.40             | 0.482                     | 11.5         | 55.5                   | 0.819       | 224                   | 8.5                               |
| 01zI                           | 364      | 192       | 0.54             | 0.302                     | 13.7         | 55.5                   | 0.822       | 167                   | 4.0                               |
| 01zJ                           | 240      | 109       | 0.47             | 0.203                     | 25.1         | 82.8                   | 0.865       | 163                   | 3.4                               |
| 01zK                           | 306      | 170       | 0.57             | 0.272                     | 17.1         | 63.3                   | 0.837       | 174                   | 3.6                               |
| 01zL                           | 315      | 125       | 0.41             | 0.273                     | 21.2         | 71.0                   | 0.852       | 173                   | 3.6                               |
| 01zM                           | 309      | 156       | 0.52             | 0.279                     | 15.6         | 55.0                   | 0.825       | 182                   | 4.4                               |
| 01zN                           | 435      | 192       | 0.45             | 0.373                     | 10.1         | 43.8                   | 0.786       | 184                   | 4.5                               |
| 01zO                           | 376      | 205       | 0.56             | 0.311                     | 9.3          | 50.0                   | 0.800       | 170                   | 4.3                               |
| 01zP                           | 363      | 137       | 0.39             | 0.292                     | 16.6         | 64.0                   | 0.840       | 163                   | 3.9                               |
| 01zQ                           | 274      | 122       | 0.46             | 0.275                     | 44.7         | 92.3                   | 0.885       | 190                   | 3.7                               |
| 01zR                           | 353      | 130       | 0.38             | 0.368                     | 9.1          | 53.5                   | 0.806       | 221                   | 5.1                               |
| <u>Fish Springs, BPVF</u>      |          |           |                  |                           |              |                        |             |                       |                                   |
| 24zA                           | 510      | 473       | 0.95             | 0.789                     | 4.1          | 32.3                   | 0.717       | 328                   | 8.7                               |
| 24zB                           | 479      | 163       | 0.35             | 0.581                     | 1.9          | 30.8                   | 0.685       | 305                   | 12.3                              |
| 24zD                           | 1089     | 456       | 0.43             | 1.318                     | 7.0          | 44.8                   | 0.781       | 261                   | 5.9                               |
| 24zF                           | 3124     | 30        | 0.01             | 4.841                     | 6.2          | 47.8                   | 0.787       | 365                   | 11.8                              |
| 24zG                           | 1106     | 488       | 0.45             | 1.163                     | 3.6          | 32.5                   | 0.718       | 246                   | 11.0                              |
| 24zH                           | 3852     | 2183      | 0.58             | 6.566                     | 3.6          | 35.8                   | 0.732       | 381                   | 11.8                              |
| 24zI                           | 2830     | 1566      | 0.57             | 4.334                     | 11.4         | 49.8                   | 0.807       | 312                   | 5.9                               |
| 24zJ                           | 492      | 413       | 0.86             | 0.864                     | 13.2         | 61.0                   | 0.828       | 329                   | 6.4                               |
| 24zK                           | 2970     | 1626      | 0.56             | 4.660                     | 30.8         | 70.3                   | 0.857       | 301                   | 5.7                               |
| 24zL                           | 189      | 153       | 0.83             | 0.243                     | 12.7         | 59.8                   | 0.825       | 243                   | 6.1                               |
| 24zM                           | 1098     | 334       | 0.31             | 1.173                     | 8.1          | 45.5                   | 0.790       | 234                   | 5.2                               |
| 24zO                           | 675      | 434       | 0.66             | 0.824                     | 5.2          | 37.5                   | 0.750       | 262                   | 6.1                               |
| 24zP                           | 836      | 1543      | 1.89             | 1.497                     | 5.6          | 34.5                   | 0.730       | 317                   | 6.4                               |
| 24zQ                           | 1076     | 474       | 0.45             | 1.171                     | 5.8          | 42.5                   | 0.771       | 238                   | 4.7                               |
| 24zR                           | 812      | 416       | 0.53             | 0.909                     | 9.1          | 47.0                   | 0.794       | 233                   | 4.5                               |
| <u>Prindle volcano, Alaska</u> |          |           |                  |                           |              |                        |             |                       |                                   |
| 595-1a                         | 964      | 318       | 0.34             | 0.688                     | 2.5          | 37.3                   | 0.729       | 169                   | 3.3                               |
| 595-1b                         | 542      | 188       | 0.36             | 0.453                     | 3.2          | 37.0                   | 0.732       | 196                   | 4.0                               |
| 595-1c                         | 64       | 159       | 2.56             | 0.073                     | 9.0          | 54.5                   | 0.804       | 166                   | 2.9                               |
| 595-1d                         | 468      | 213       | 0.47             | 0.348                     | 2.9          | 34.0                   | 0.713       | 175                   | 3.9                               |
| 595-1f                         | 1189     | 376       | 0.32             | 0.940                     | 2.6          | 35.3                   | 0.719       | 190                   | 4.2                               |

Little Bear Mountain, British Columbia

|        |      |     |      |       |      |       |       |     |     |
|--------|------|-----|------|-------|------|-------|-------|-----|-----|
| 595-4a | 2421 | 598 | 0.25 | 1.946 | 51.3 | 104.5 | 0.898 | 157 | 3.3 |
| 595-4b | 1587 | 436 | 0.28 | 1.220 | 12.6 | 59.8  | 0.829 | 162 | 3.4 |
| 595-4z | 1449 | 412 | 0.29 | 0.954 | 3.6  | 33.3  | 0.722 | 159 | 3.3 |
| 595-4y | 1571 | 570 | 0.37 | 1.103 | 4.4  | 45.0  | 0.772 | 155 | 3.4 |
| 595-4c | 1977 | 622 | 0.32 | 1.423 | 13.7 | 59.3  | 0.827 | 151 | 3.0 |
| 595-4d | 1672 | 610 | 0.37 | 1.268 | 7.9  | 48.0  | 0.795 | 163 | 3.2 |
| 595-4e | 1558 | 464 | 0.31 | 1.189 | 16.9 | 63.8  | 0.841 | 158 | 3.2 |
| 595-4f | 1721 | 489 | 0.29 | 1.324 | 29.0 | 79.3  | 0.868 | 154 | 3.0 |

---

## REFERENCES

- Connor, C.B., and Conway, F.M., 2000, Basaltic volcanic fields, *in* Sigurdsson, H., Houghton, B.F., McNutt, S.R., Rymer, H., Stix, J., and Ballard, R.D., eds., *Encyclopedia of volcanoes*: San Diego, Academic Press, p. 331-344.
- Crank, J., 1975, *The Mathematics of Diffusion*: Oxford, Clarendon Press, 414 p.
- Darrow, A.C., 1972, *Origin of basalts of the Big Pine Volcanic Field* [M.A. thesis]: Santa Barbara, University of California, 61 p.
- Dusel-Bacon, C., 1994, Map and table showing metamorphic rocks of Alaska, *in* Plafker, G., and Berg, H.C., eds., *The geology of Alaska*: Boulder, CO, Geological Society of America, p. 2 sheets.
- Dusel-Bacon, Cynthia, Hansen, V.L., and Scala, J.A., 1995, High-pressure amphibolite facies dynamic metamorphism and the Mesozoic tectonic evolution of an ancient continental margin, east-central Alaska: *Journal of Metamorphic Geology*, v. 13, no. 1, p. 9-24.
- Edwards, B.R., 1997, Field, kinetic and thermodynamic studies of magmatic assimilation in the northern cordilleran volcanic province, northwestern British Columbia [Ph.D. thesis]: Vancouver, University of British Columbia, 324 p.
- Edwards, B.R., Anderson, R.G., Russell, J.K., Hastings, N.L., and Guo, Y.T., 1999a, Geology of the Quaternary Hoodoo Mountain Volcanic Complex and adjacent Paleozoic and Mesozoic basement rocks; parts of Hoodoo Mountain (NTS 104B/14) and Craig River (NTS 104B/11) map areas, northwestern British Columbia., Geological Survey of Canada, Open File, scale 1:20 000.
- Edwards, B.R., Edwards, G., and Russell, J.K., 1995, Revised stratigraphy for the Hoodoo Mountain volcanic centre, northwestern British Columbia, Cordillera and Pacific margin: Ottawa, Geological Survey of Canada, p. 105-115.
- Edwards, B.R., and Russell, J.K., 2000, Distribution, nature, and origin of Neogene-Quaternary magmatism in the northern Cordilleran volcanic province, Canada: *Geol Soc Am Bull*, v. 112, p. 1280-1295.
- Edwards, B.R., Russell, J.K., and Anderson, R.G. 2002, Subglacial, phonolitic volcanism at Hoodoo Mountain volcano, northern Canadian Cordillera: *Bulletin of Volcanology*, v. 64, p. 254-272.
- Edwards, B.R., Russell, J.K., Villeneuve, M., and Hastings, N., 1999b, Punctuated, peralkaline, subglacial volcanism at Hoodoo Mountain Volcano, northwestern British Columbia, Canada, Am Geophys Union, Fall Meeting: San Francisco, CA, p. V12A-02.
- Foster, H.L., Forbes, R.B., and Ragan, D.L., 1966, Granulite and peridotite inclusions from Prindle Volcano, Yukon-Tanana Upland, Alaska: *USGS Professional Paper*, v. 550B, p. B115-B119.
- Ghent, E., Edwards, B.R., and Russell, J.K., 2004, Constraints on P-T conditions and evolution of granulite and ultramafic xenoliths from Prindle Volcano, Alaska [abs.]: *Eos (Transactions, American Geophysical Union)*, v. 72, p. 501.
- Gillespie, A.R., Huneke, J.C., and Wasserburg, G.J., 1983, Eruption age of a Pleistocene basalt from  $^{40}\text{Ar}$ - $^{39}\text{Ar}$  analysis of partially degassed xenoliths: *Journal of Geophysical Research*, v. 88, p. 4997-5008.

- Hunt, P.A., and Roddick, J.C., 1992, A compilation of K/Ar and  $^{40}\text{Ar}/^{39}\text{Ar}$  ages: Report 22: Geological Survey of Canada Paper, v. 92, p. 179-266.
- Martel, S.J., Harrison, T.M., and Gillespie, A.R., 1987, Late Quaternary vertical displacement rate across the Fish Springs Fault, Owens Valley Fault Zone, California: *Quaternary Research*, v. 27, p. 113-129.
- McDougall, I., and Harrison, T.M., 1999, *Geochronology and Thermochronology by the  $^{40}\text{Ar}/^{39}\text{Ar}$  Method*: New York, Oxford University Press, 2nd edition, 269 p.
- Meesters, A.G.C.A., and Dunai, T.J., 2002a, Solving the production-diffusion equation for finite diffusion domains of various shapes: Part I. Implications for low-temperature (U-Th)/He thermochronology: *Chemical Geology*, v. 186, p. 333-344.
- , 2002b, Solving the production-diffusion equation for finite diffusion domains of various shapes: Part II. Application to cases with [alpha]-ejection and nonhomogeneous distribution of the source: *Chemical Geology*, v. 186, p. 347-363.
- Prescott, J., 1983, Petrogenesis of ultramafic xenoliths from the Canadian Cordillera and Alaska [Masters thesis]: Montreal, McGill University, 185 p.
- Reiners, P.W., 2005, Zircon (U-Th)/He Thermochronometry, in Reiners, P.W., and Ehlers, T.A., eds., *Thermochronology, Reviews in Mineralogy and Geochemistry, Volume 58*: Washington, DC, Mineralogical Society of America and Geochemical Society.
- Reiners, P.W., Spell, T.L., Nicolescu, S., and Zanetti, K.A., 2004, Zircon (U-Th)/He thermochronometry: He diffusion and comparisons with  $^{40}\text{Ar}/^{39}\text{Ar}$  dating: *Geochimica et Cosmochimica Acta*, v. 68, p. 1857-1887.
- Roughly, C., Edwards, B.R., and Russell, J.K., 2000, Crustal-derived xenoliths from Prindle Volcano, Alaska: Implications for the lithospheric stratigraphy of the central Yukon-Tanana terrane, GAC-MAC 2000 Annual Meeting Program with Abstracts: Calgary, AB, p. Poster #171.
- Turrin, B., and Gillespie, A., 1986, K/Ar ages of basaltic volcanism of the Big Pine Volcanic Field, California: Implications for glacial stratigraphy and neotectonics of the Sierra Nevada: *Geological Society of America Abstracts with Programs*, v. 18, p. 414.
- Villeneuve, M.E., Whalen, J.B., Edwards, B.R., and Anderson, R.G., 1998, Time-scales of episodic magmatism in the Canadian Cordillera as determined by  $^{40}\text{Ar}/^{39}\text{Ar}$  geochronology, Program with Abstracts - Joint GAC-MAC Annual Meeting, Volume 23: Quebec City, PQ, Canada, GAC, p. 192.
